# Supplementary material for: In situ synchrotron X-ray diffraction with laser-heated diamond anvil cells study of Pt up to 95 GPa and 3150 K
Source: Royal Society of Chemistry journal article supplement (doi:10.1039/c4ra12769b), 2015-01-01
Supplement: c4ra12769b1.pdf [file c4ra12769b1.pdf]

## Supporting Information

### *In situ* Synchrotron X-ray Diffraction with Laser-heated Diamond Anvil Cells Study of Pt up to 95 GPa and 3150 K

Xiaoli Huang, Fangfei Li, Qiang Zhou, Gang Wu, Yanping Huang, Lu Wang,  
Bingbing Liu, and Tian Cui\*

\*Corresponding author, E-mail: [cuitian@jlu.edu.cn](mailto:cuitian@jlu.edu.cn)

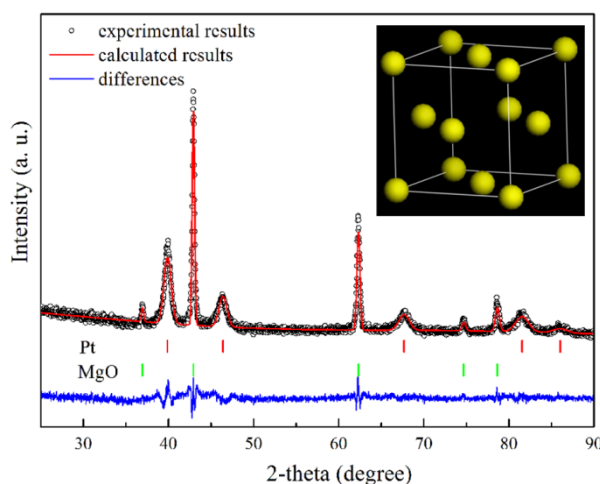

**Fig. S1** The XRD pattern of the original sample at ambient conditions. The wavelength of the incident X-ray is 1.54 Å and the inset shows the crystal structure of Pt with space group *Fm-3m*.

**Table S1.** Summary of experimental conditions for the different runs performed in this study.

| Experimental run | $P_{\min}$ (GPa) | $T$ range (K) |
|------------------|------------------|---------------|
| Pt+MgO+Ne_1      | 24.0             | 300–1947      |
| Pt+MgO+Ne_2      | 49.7             | 300–2580      |
| Pt+MgO+Ne_3      | 62.0             | 300–3002      |
| Pt+MgO+Ne_4      | 68.0             | 300–2588      |
| Pt+MgO+Ne_5      | 80.0             | 300–3152      |

**Table SII.** The lattice constant of Pt calculated from individual diffraction peaks and the average lattice constant with different pressure at 300 K.

| Pressure | Pt- $a_{(111)}$ | Pt- $a_{(200)}$ | Pt- $a_{(220)}$ | Pt- $a_{(311)}$ | Pt- $a_{(222)}$ | Pt- $a(\text{average})$ |
|----------|-----------------|-----------------|-----------------|-----------------|-----------------|-------------------------|
| 0.6      | 3.9179          | 3.9192          | 3.9151          | 3.9149          | 3.9155          | 3.9156 (7)              |
| 6.5      | 3.8968          | 3.9022          | 3.8942          | 3.9017          | 3.8999          | 3.899 (1)               |
| 6.7      | 3.8931          | 3.8944          | 3.8933          | 3.8934          | 3.8982          | 3.8943 (9)              |
| 8.3      | 3.8855          | 3.8862          | 3.8843          | 3.8861          | 3.8885          | 3.8865 (8)              |
| 10.9     | 3.8774          | 3.8818          | 3.8747          | 3.8785          | 3.8753          | 3.877 (1)               |
| 13.9     | 3.8665          | 3.867           | 3.8648          | 3.8675          | 3.8656          | 3.8662 (5)              |
| 18.0     | 3.8562          | 3.8598          | 3.8554          | 3.8546          | 3.8545          | 3.8552 (6)              |
| 20.1     | 3.8464          | 3.8508          | 3.8464          | 3.8460          | 3.8459          | 3.8462 (6)              |
| 21.9     | 3.8403          | 3.8414          | 3.8413          | 3.8403          | 3.8407          | 3.8408 (3)              |
| 49.3     | 3.7603          | 3.7822          | 3.7700          | 3.7630          | 3.7776          | 3.769 (4)               |
| 60.6     | 3.7314          | 3.7344          | 3.7313          | 3.7299          | 3.7308          | 3.7309 (6)              |
| 67.6     | 3.7175          | 3.7172          | 3.7154          | 3.7146          | 3.7177          | 3.7195 (1)              |
| 72.2     | 3.7121          | 3.7122          | 3.7103          | 3.7093          | 3.7101          | 3.7101 (4)              |
| 77.7     | 3.6998          | 3.6986          | 3.6985          | 3.6980          | 3.6993          | 3.6987 (3)              |

**Table SIII.** The lattice constant of MgO calculated from individual diffraction peaks and the average lattice constant with different pressure at 300 K.

| Pressure | MgO- $a_{(111)}$ | MgO- $a_{(200)}$ | MgO- $a_{(220)}$ | MgO- $a_{(311)}$ | MgO- $a_{(222)}$ | MgO- $a$ (average) |
|----------|------------------|------------------|------------------|------------------|------------------|--------------------|
| 0.6      | 4.2046           | 4.2052           | 4.2047           | 4.2035           | 4.2058           | 4.2052 (4)         |
| 6.5      | 4.1713           | 4.1726           | 4.1714           | 4.1719           | 4.1718           | 4.158 (7)          |
| 6.7      | 4.1557           | 4.1576           | 4.1569           | 4.1571           | 4.1573           | 4.1571 (2)         |
| 8.3      | 4.1417           | 4.1464           | 4.1451           | 4.1451           | 4.1451           | 4.1451 (4)         |
| 10.9     | 4.1245           | 4.127            | 4.1272           | 4.1272           | 4.1261           | 4.1268 (4)         |
| 13.9     | 4.1039           | 4.1066           | 4.1063           | 4.1073           | 4.1074           | 4.1070 (4)         |
| 18.0     | 4.0864           | 4.0840           | 4.0831           | 4.0804           | 4.0831           | 4.0821 (8)         |
| 20.1     | 4.0745           | 4.0688           | 4.0684           | 4.0695           | 4.0693           | 4.0694 (8)         |
| 21.9     | 4.0684           | 4.0596           | 4.0582           | 4.0602           | 4.0565           | 4.059 (1)          |
| 49.3     | 3.9319           | 3.9246           | 3.9338           | 3.9209           | 3.9397           | 3.933 (4)          |
| 60.6     | 3.8919           | 3.8890           | 3.8902           | 3.8894           | 3.8957           | 3.892 (1)          |
| 67.6     | 3.8618           | 3.8626           | 3.8614           | 3.8616           | 3.8625           | 3.8689 (2)         |
| 72.2     | 3.8547           | 3.8566           | 3.8543           | 3.8543           | 3.8545           | 3.8547 (5)         |
| 77.7     | 3.8394           | 3.8380           | 3.8356           | 3.8377           | 3.8396           | 3.8379 (8)         |
